# Supplementary material for: SnO2 and TiO2-supported-SnO2 lithium battery anodes with improved electrochemical performance
Source: Royal Society of Chemistry journal article supplement (doi:10.1039/c2jm16328d), 2012-01-01
Supplement: c2jm16328d.pdf [file c2jm16328d.pdf]

**Supplementary Information**

*for*

**A Fast and Stable TiO<sub>2</sub>-Supported SnO<sub>2</sub>-Nanocomposite Lithium  
Ion Battery Anode**

**Yong-Mao Lin,<sup>‡ab</sup> Rajaram K. Nagarale,<sup>‡b</sup> Kyle C. Klavetter,<sup>ab</sup> Adam Heller<sup>\*b</sup> and  
C. Buddie Mullins<sup>\*a</sup>**

*<sup>a</sup>Departments of Chemical Engineering and Chemistry and Biochemistry, Center for Electrochemistry,  
Texas Materials Institute, and Center for Nano- and Molecular Science, University of Texas at Austin  
1 University Station, C0400 Austin, TX 78712-0231, United States  
Email: mullins@che.utexas.edu*

*<sup>b</sup>Department of Chemical Engineering, University of Texas, Austin, Texas 78712-0231, United States  
Email: heller@che.utexas.edu*

<sup>‡</sup>These authors contributed equally to this work.

<sup>\*</sup>mullins@che.utexas.edu

## Supplementary Figures

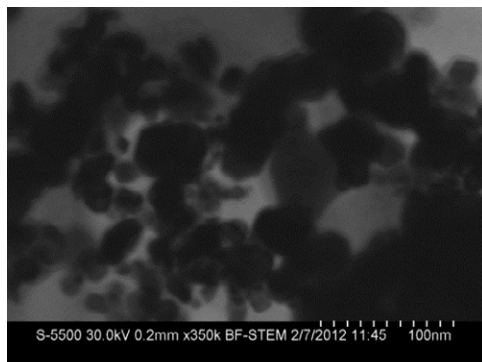

Figure S1. STEM image of the SnO<sub>2</sub> nanoparticles (Aldrich).

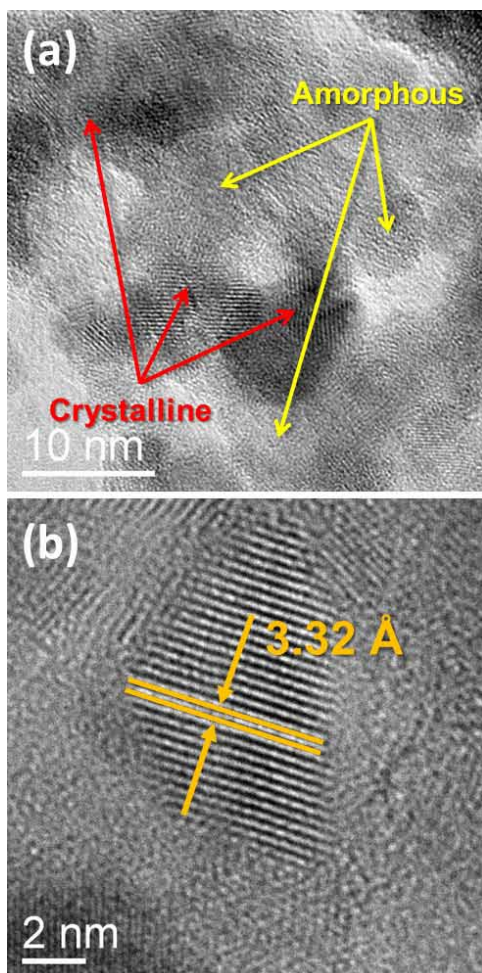

Figure S2. TEM images of the SnO<sub>2</sub>/TiO<sub>2</sub> nanocomposite (a) at a low magnification and (b) at a high magnification. The orange arrows and solid lines in (b) indicate two consecutive fringes.
